# Supplementary material
Source: MDPI journal article supplement (https://www.mdpi.com/search?q=ijerph-17-04316)
Supplement: s001 [file ijerph-17-04316-s001.pdf]

**Table S1.** Partial correlations analyses of physical fitness components and risk of depression score.

|            |         | Cardiorespiratory<br>Fitness | Upper Limb<br>Muscular<br>Strength | Lower Limb<br>Muscular<br>Strength | Speed-Agility | Body Mass<br>Index | Waist<br>Circumference | Body Fat |
|------------|---------|------------------------------|------------------------------------|------------------------------------|---------------|--------------------|------------------------|----------|
| Risk of    | $\beta$ | -0.159                       | 0.004                              | -0.014                             | -0.088        | 0.141              | 0.133                  | 0.110    |
| depression | P       | <b>0.018</b>                 | 0.957                              | 0.841                              | 0.191         | <b>0.036</b>       | <b>0.049</b>           | 0.102    |

Statistically significant values are in bold.
